# Supplementary material
Source: PubMed Central journal article supplement (PMC1440309)

## Supplementary figure: Sequence alignment and topology diagram

(A) Sequence alignment of *M. tuberculosis* LppX with orthologs from *M. bovis*, *M. leprae*, *M. marinum* and *M. ulcerans* and the *M. tuberculosis* LprAFG proteins. Filled circles and triangles indicate aliphatic and polar residues that line the cavity, respectively; asterisks denote residues bound to zinc ions. For clarity purposes, only residues from the mature proteins are shown. (B) Topology diagrams for LppX (left), LoLA (middle) and LoLB (right). Diagrams drawn with the program TopDraw (Bond, C.S. (2003). TopDraw: a sketchpad for protein structure topology cartoons. *Bioinformatics* 19, 311-312.)

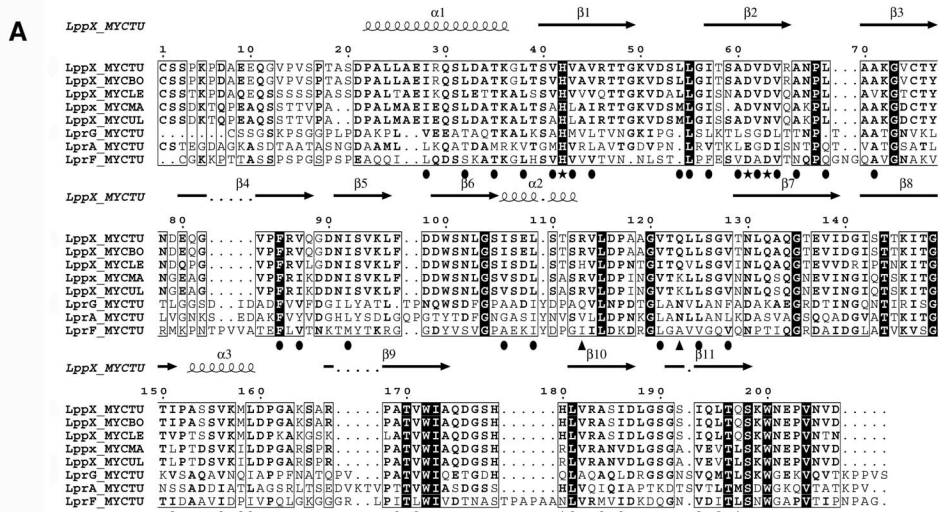

Supplement: 7601048s1.pdf [file 7601048s1.pdf]
